# Supplementary material for: Emergence of fexA in Mediating Resistance to Florfenicols in Campylobacter
Source: PubMed Central journal article supplement (PMC7317992; doi:10.1128/aac.00260-20), 2020-06-23
Supplement: AAC.00260-20-s0001.pdf [file AAC.00260-20-s0001.pdf]

## Supplementary figures

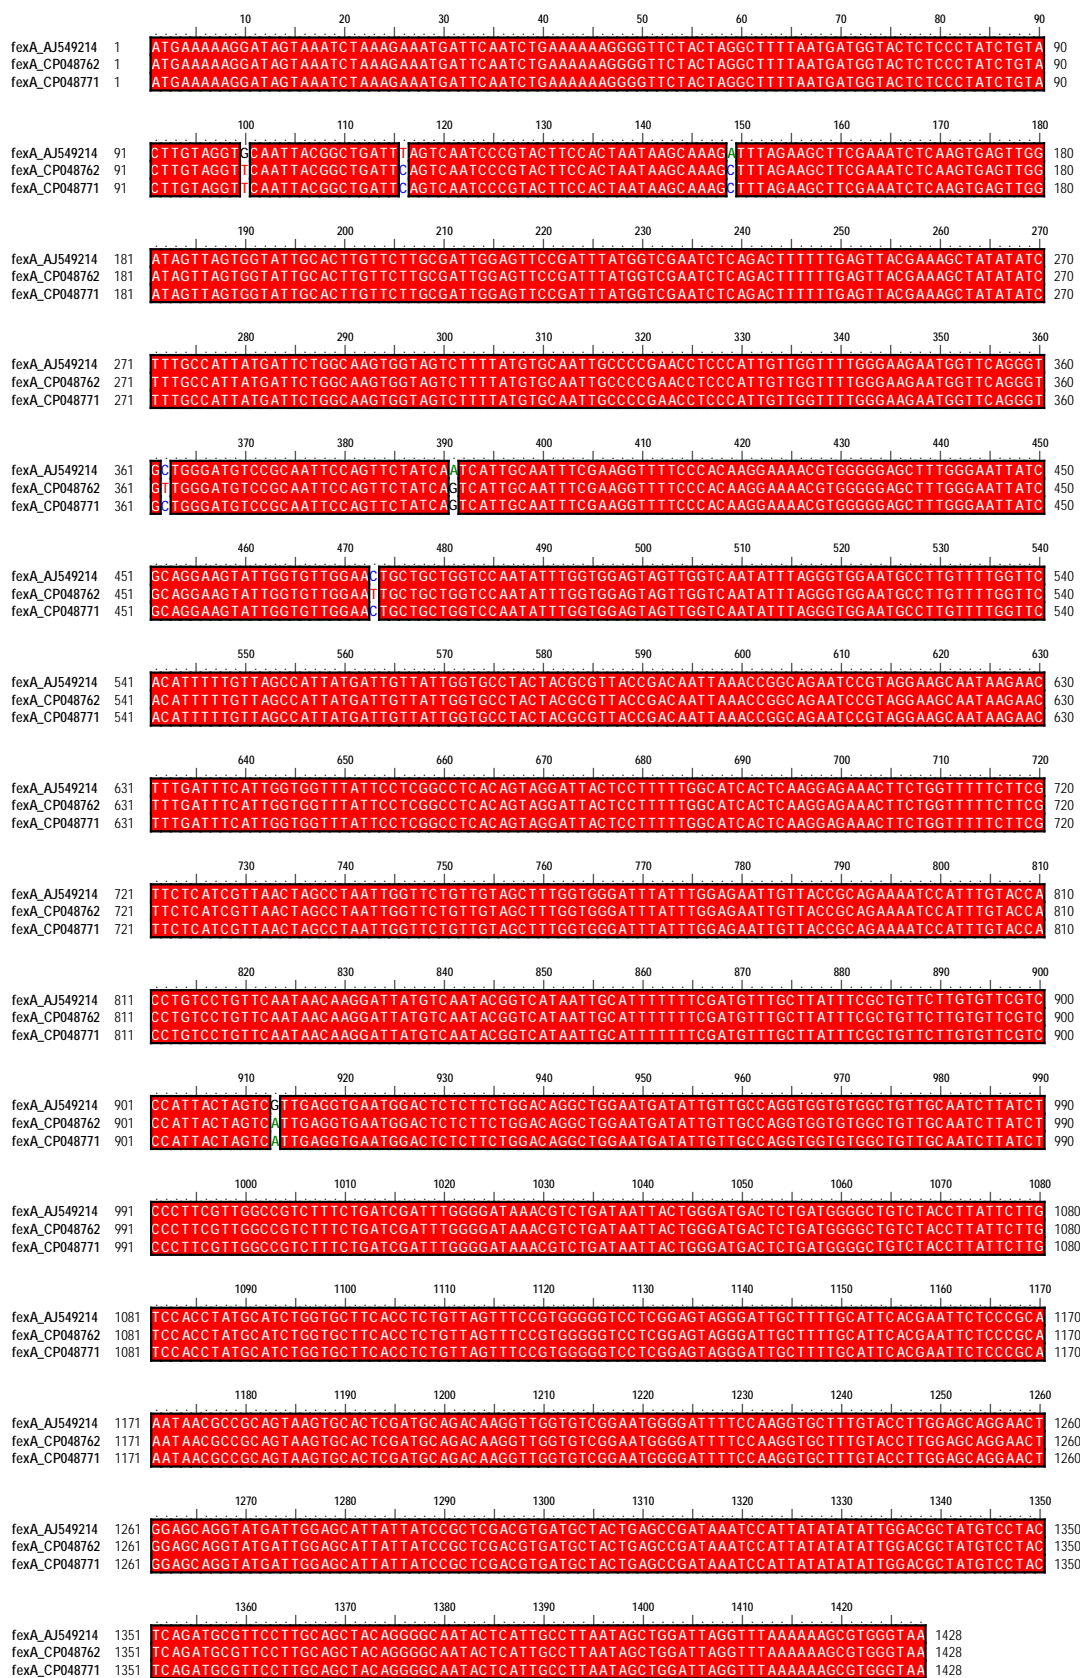

Figure S1. Comparison of nucleic acid sequences of *flexA* gene.

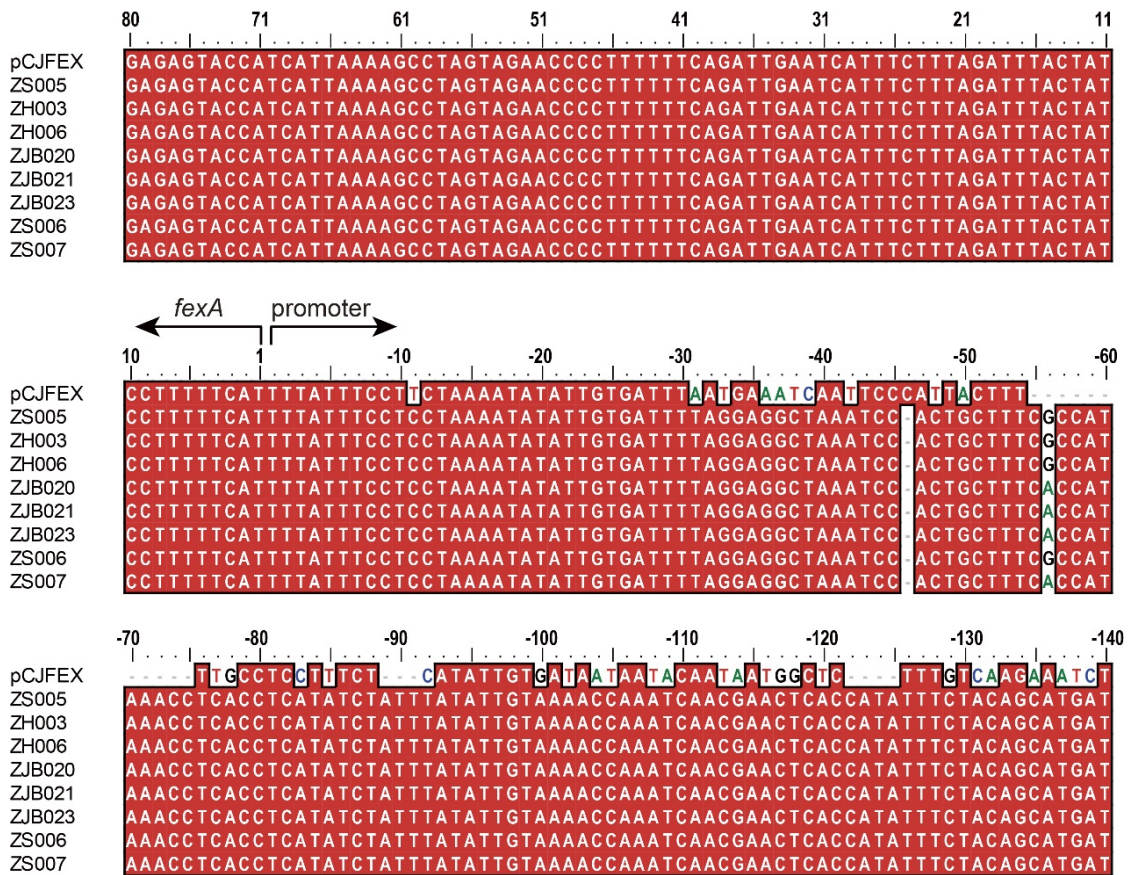

Figure S2. Comparison of promoter regions of *fexA* gene.

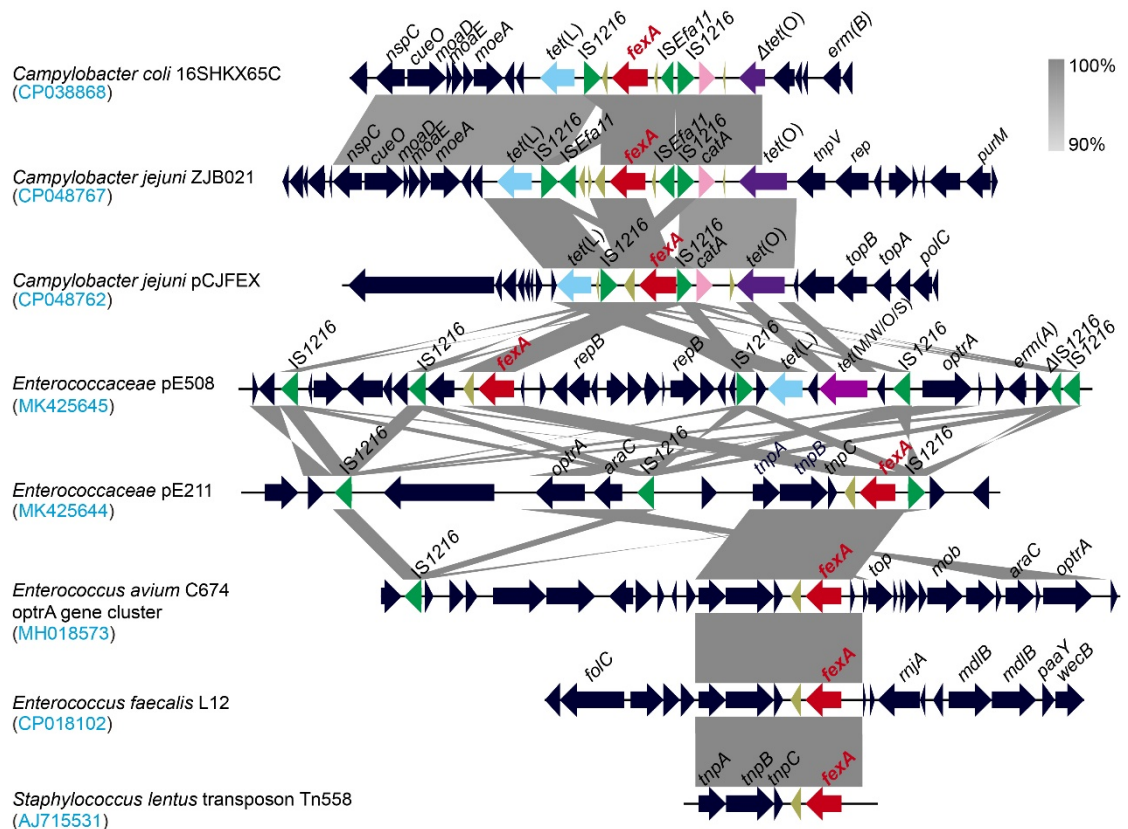

Figure S3. Genetic environment contents of *fexA* gene in staphylococci, enterococci and *Campylobacter*.
